# Supplementary material for: Porous CoSe2 nanosheet arrays derived from zeolitic imidazolate frameworks on Ni foam for asymmetric supercapacitors
Source: Royal Society of Chemistry journal article supplement (doi:10.1039/d3dt00599b), 2023-01-01
Supplement: d3dt00599b1.pdf [file d3dt00599b1.pdf]

## Supplementary Information

### Porous CoSe<sub>2</sub> nanosheet arrays derived from zeolitic imidazolate framework on Ni

### foam for asymmetric supercapacitor

Jincheng Fan<sup>a</sup>, Zhuo Peng<sup>a</sup>, Meilin Chen<sup>a</sup>, Wei Yang<sup>a</sup>, Hanbo Zou<sup>\*a</sup>, Shengzhou Chen<sup>\*b</sup>

<sup>a</sup> School of Chemistry and Chemical Engineering, Guangzhou University, Guangzhou 510006, China

<sup>b</sup> Guangzhou Key Laboratory for New Energy and Green Catalysis, Guangzhou University, Guangzhou 510006, China

#### Corresponding authors:

<sup>\*a</sup> E-mail: [zouhb@gzhu.edu.cn](mailto:zouhb@gzhu.edu.cn) (H. Zou)

<sup>\*b</sup> E-mail: [szchen@gzhu.edu.cn](mailto:szchen@gzhu.edu.cn) (S. Chen).

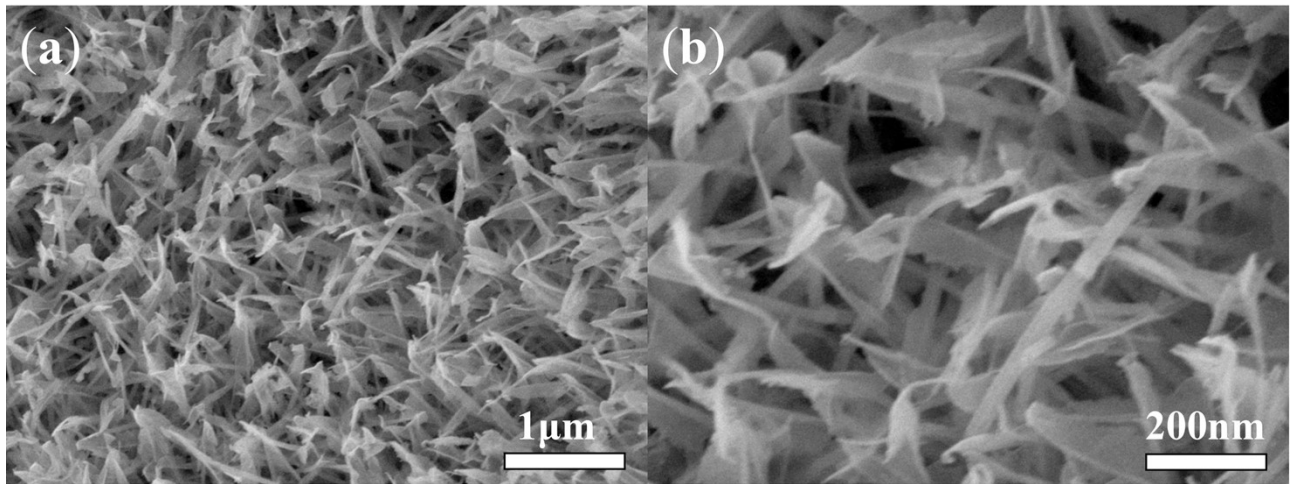

Fig. S1 SEM images of  $\text{Co}_3\text{O}_4$  at different magnifications

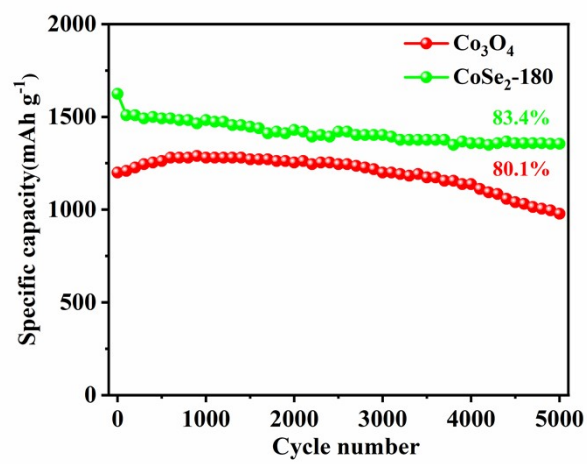

Fig. S2 Cycling performance of the  $\text{Co}_3\text{O}_4$  and  $\text{CoSe}_2\text{-180}$  electrodes

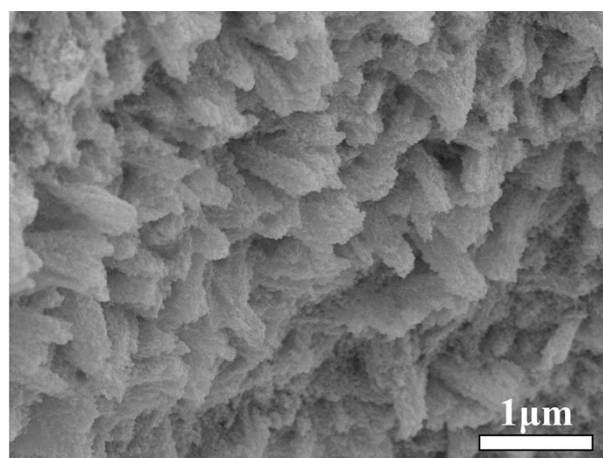

Fig. S3 SEM of  $\text{CoSe}_2\text{-180}$  electrode after 5000 GCD cycles.

**Table S1** Comparisons of specific capacity of the Co<sub>3</sub>O<sub>4</sub> and CoSe<sub>2</sub>-180 electrode

| Current density<br>(A g <sup>-1</sup> ) | Specific capacity (mAh g <sup>-1</sup> ) |                        |
|-----------------------------------------|------------------------------------------|------------------------|
|                                         | Co <sub>3</sub> O <sub>4</sub>           | CoSe <sub>2</sub> -180 |
| 1                                       | 166.9                                    | 269.4                  |
| 2                                       | 160.6                                    | 262.1                  |
| 5                                       | 157.5                                    | 251.4                  |
| 10                                      | 152.2                                    | 241.1                  |
| 20                                      | 505                                      | 225.6                  |

**Table S2** Comparison of the electrical performance of different ASC devices

| ASC device                                      | Energy density (Wh kg <sup>-1</sup> ) | Power density (W kg <sup>-1</sup> ) | References       |
|-------------------------------------------------|---------------------------------------|-------------------------------------|------------------|
| <b>CoSe<sub>2</sub>-180//AC</b>                 | <b>45.6</b>                           | <b>800.8</b>                        | <b>This work</b> |
| E-CoSe <sub>2</sub> /Ni <sub>0.85</sub> Se//AC  | 40.5                                  | 538                                 | 1                |
| CoSe <sub>2</sub> / NC-400//AC                  | 40.9                                  | 980                                 | 2                |
| Co <sub>0.85</sub> Se nanosheet//AC             | 39.7                                  | 789.6                               | 3                |
| Ni-Co-Se//AC                                    | 38.5                                  | 802.1                               | 4                |
| 3D interconnected ultrathin CoSe nanosheets//AC | 18.6                                  | 750                                 | 5                |
| (Ni, Co)Se <sub>2</sub> //BiSe                  | 34.4                                  | 373                                 | 6                |

## References

1. J. Lin, H. Wang, Y. Yan, X. Zheng, H. Jia, J. Qi, J. Cao, J. Tu, W. Fei and J. Feng, *J. Mater. Chem. A*, 2018, **6**, 19151-19158.
2. C. Miao, X. Xiao, Y. Gong, K. Zhu, K. Cheng, K. Ye, J. Yan, D. Cao, G. Wang and P. Xu, *ACS Appl Mater Interfaces*, 2020, **12**, 9365-9375.
3. C. Gong, M. Huang, P. Zhou, Z. Sun, L. Fan, J. Lin and J. Wu, *Appl. Surf. Sci.*, 2016, **362**, 469-476.
4. G. Qu, X. Zhang, G. Xiang, Y. Wei, J. Yin, Z. Wang, X. Zhang and X. Xu, *Chin. Chem. Lett.*, 2020, **31**, 2007-2012.
5. Y. Zhu, Z. Huang, Z. Hu, L. Xi, X. Ji and Y. Liu, *Electrochim. Acta*, 2018, **269**, 30-37.
6. H. Lei, J. Zhou, R. Zhao, H. Peng, Y. Xu, F. Wang, H. A. Hamouda, W. Zhang and G. Ma, *Electrochim. Acta*, 2020, **363**, 137206.
